# Supplementary material for: Insights on Embolic Protection, Repositioning, and Stroke: A Subanalysis of the RESPOND Study
Source: Hindawi journal article supplement (doi:10.1155/2020/3070427), 2020-05-18
Supplement: f1 [file 3070427.f1.pdf]

**Supplementary Table 1. Univariate analysis for multivariate modeling of stroke/TIA  $\leq 72$  hours post-procedure**

| Variable                                                         | N   | Events | Odds Ratio<br>95% C.I. | P value |
|------------------------------------------------------------------|-----|--------|------------------------|---------|
| <i>Univariate analysis</i>                                       |     |        |                        |         |
| History of congestive heart failure                              | 989 | 30     | 0.40[0.16,1.00]        | 0.049   |
| History of hypertension                                          | 988 | 29     | 0.49[0.22,1.07]        | 0.072   |
| History of myocardial infarction                                 | 989 | 30     | 0.18[0.02,1.31]        | 0.090   |
| Prior carotid endarterectomy/carotid artery stenting             | 972 | 29     | 3.42[0.76,15.37]       | 0.109   |
| Pre-procedure aortic valve area (Effective Orifice Area by echo) | 875 | 26     | 0.20[0.02,1.57]        | 0.124   |
| History of hyperlipidemia requiring medication                   | 978 | 27     | 0.56[0.26,1.22]        | 0.145   |
| History of cerebrovascular accidents                             | 993 | 30     | 1.96[0.73,5.26]        | 0.179   |
| History of chronic obstructive pulmonary disease (COPD)          | 994 | 30     | 0.38[0.09,1.62]        | 0.191   |
| History of transient ischemic attacks                            | 989 | 30     | 1.98[0.67,5.85]        | 0.214   |
| Embolic protection device                                        | 996 | 30     | 0.32[0.04,2.40]        | 0.270   |
| Minimum diameter of the right iliofemoral system                 | 734 | 19     | 0.86[0.64,1.13]        | 0.278   |
| History of Coronary Artery Disease (CAD)                         | 995 | 30     | 0.68[0.33,1.40]        | 0.294   |
| History of Coronary Artery Bypass Graft (CABG) surgery           | 996 | 30     | 0.50[0.12,2.12]        | 0.346   |
| Prior balloon aortic valvuloplasty                               | 989 | 30     | 1.69[0.39,7.33]        | 0.487   |
| Minimum diameter of the left iliofemoral system                  | 727 | 18     | 0.92[0.71,1.18]        | 0.504   |
| Male gender                                                      | 996 | 30     | 0.78[0.38,1.63]        | 0.515   |
| NYHA Class IV                                                    | 925 | 25     | 0.54[0.07,4.02]        | 0.544   |

|                                                         |     |    |                 |       |
|---------------------------------------------------------|-----|----|-----------------|-------|
| Pre-procedure Left Ventricular Ejection Fraction (LVEF) | 903 | 28 | 1.01[0.98,1.04] | 0.571 |
| Prior pacemaker implant                                 | 996 | 30 | 0.72[0.22,2.41] | 0.596 |
| RCA                                                     | 861 | 21 | 1.03[0.91,1.16] | 0.611 |
| History of percutaneous coronary intervention           | 993 | 30 | 1.18[0.55,2.56] | 0.669 |
| Current anginal status - CCS3                           | 996 | 30 | 1.37[0.32,5.90] | 0.676 |
| Aortic valve calcification - Moderate                   | 925 | 25 | 0.84[0.36,1.97] | 0.689 |
| Weight                                                  | 989 | 30 | 1.00[0.97,1.02] | 0.691 |
| Height                                                  | 987 | 30 | 0.99[0.96,1.03] | 0.691 |
| Overstretch $\geq 10\%$ per LVOT Area                   | 578 | 12 | 0.80[0.25,2.56] | 0.708 |
| STS Score                                               | 849 | 28 | 1.01[0.96,1.06] | 0.725 |
| Current anginal status - CCS2                           | 996 | 30 | 0.81[0.24,2.70] | 0.727 |
| EuroSCORE (2011)                                        | 925 | 27 | 1.01[0.96,1.05] | 0.739 |
| History of Atrial Fibrillation                          | 985 | 30 | 1.13[0.53,2.41] | 0.746 |
| Overstretch - per LVOT Area (%)                         | 578 | 12 | 1.00[0.97,1.04] | 0.784 |
| Porcelain aorta                                         | 991 | 30 | 0.75[0.10,5.67] | 0.785 |
| Mean aortic pressure gradient (mm Hg)                   | 906 | 27 | 1.00[0.98,1.02] | 0.834 |
| History of dialysis dependent renal failure             | 993 | 30 | 1.24[0.16,9.47] | 0.834 |
| Age at time of consent                                  | 996 | 30 | 1.01[0.95,1.06] | 0.837 |
| Overstretch $\geq 10\%$ per LVOT Diameter               | 535 | 12 | 1.13[0.34,3.82] | 0.839 |
| Overstretch - per LVOT Diameter (%)                     | 535 | 12 | 1.01[0.93,1.09] | 0.863 |
| NYHA Class III                                          | 925 | 25 | 1.07[0.47,2.46] | 0.865 |
| Aortic Regurgitation                                    | 887 | 24 | 0.92[0.36,2.36] | 0.866 |
| Current anginal status - None                           | 996 | 30 | 1.07[0.47,2.44] | 0.868 |
| Aortic valve calcification - Mild                       | 925 | 25 | 0.92[0.31,2.70] | 0.873 |
| Medically treated Diabetes                              | 996 | 30 | 1.06[0.45,2.51] | 0.889 |
| NYHA Class II                                           | 925 | 25 | 1.06[0.44,2.58] | 0.892 |

|                                                      |     |    |                  |       |
|------------------------------------------------------|-----|----|------------------|-------|
| BMI (kg/m <sup>2</sup> )                             | 986 | 30 | 1.00[0.92,1.07]  | 0.907 |
| NYHA Class I                                         | 925 | 25 | 1.09[0.14,8.34]  | 0.930 |
| Height of LCA                                        | 865 | 22 | 1.00[0.87,1.14]  | 0.960 |
| Aortic valve calcification - Severe                  | 925 | 25 | 0.98[0.43,2.24]  | 0.964 |
| Current anginal status - CCS1                        | 996 | 30 | 0.97[0.29,3.27]  | 0.965 |
| History of Atrial Flutter                            | 987 | 30 | NE               | 0.978 |
| COPD - Supplemental oxygen dependent                 | 994 | 30 | NE               | 0.983 |
| Severe liver disease/cirrhosis                       | 993 | 30 | NE               | 0.985 |
| Hostile chest/unfavorable chest wall anatomy         | 995 | 30 | NE               | 0.987 |
| Current anginal status - CCS4                        | 996 | 30 | NE               | 0.989 |
| <i>Multivariate analysis*</i>                        |     |    |                  |       |
| History of Congestive Heart Failure                  | 959 | 28 | 0.30[0.11,0.82]  | 0.019 |
| History of hypertension                              |     |    | 0.46[0.20,1.05]  | 0.067 |
| Prior carotid endarterectomy/carotid artery Stenting |     |    | 3.95[0.86,18.09] | 0.076 |

\*Factors from the univariate model with  $P \leq 0.20$  (shaded boxes) were modeled using a stepwise multivariate procedure in a logistic regression model. The significance level thresholds for entry and exit of independent variables into the multivariate model were set at 0.1.

NE, Not Evaluable
